# Supplementary material for: Transportation and fate of gold nanoparticles in oilseed rape
Source: Royal Society of Chemistry journal article supplement (doi:10.1039/c5ra07278f), 2015-01-01
Supplement: c5ra07278f1.pdf [file c5ra07278f1.pdf]

## **Supporting Information**

### **Transportation and fate of gold nanoparticles in oilseed rape**

Jichao Zhang,<sup>a</sup> Liang Pan,<sup>a</sup> Min Lv,<sup>a</sup> Ali Aldalbahi,<sup>b</sup> Tian Xie,<sup>c</sup> Aiguo Li,<sup>d</sup>  
Renzhong Tai,<sup>d</sup> Qing Huang,<sup>a</sup> Chunhai Fan,<sup>a</sup> Yun Zhao\*<sup>c</sup> and Ying Zhu\*<sup>a</sup>

*<sup>a</sup>Division of Physical Biology, and Bioimaging Center, Shanghai Synchrotron Radiation Facility, Shanghai Institute of Applied Physics, Chinese Academy of Sciences, Shanghai 201800, China*

*<sup>b</sup>Chemistry Department, King Saud University, Riyadh11451, Saudi Arabia*

*<sup>c</sup>Key Laboratory of Bio-Resources and Eco-Environment, Ministry of Education, College of Life Sciences, Sichuan University, Chengdu 610064, China*

*<sup>d</sup>Shanghai Synchrotron Radiation Facility, Shanghai 201203, China*

\*To whom correspondence should be addressed. E-mail: zhaoyun@scu.edu.cn,

zhuying@sinap.ac.cn

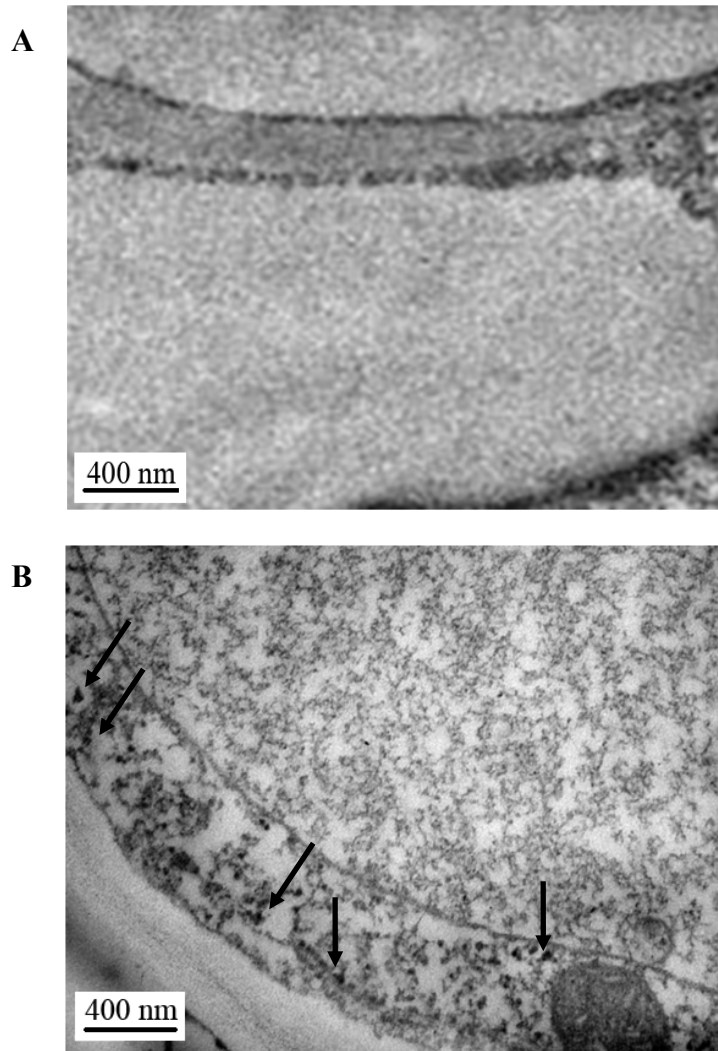

**Fig. S1.** TEM images of plantlet stems. (A) control (B) rape plantlet were exposed to a AuNPs suspension (10nM) for 3 days. Black arrows indicate the location of the AuNPs.

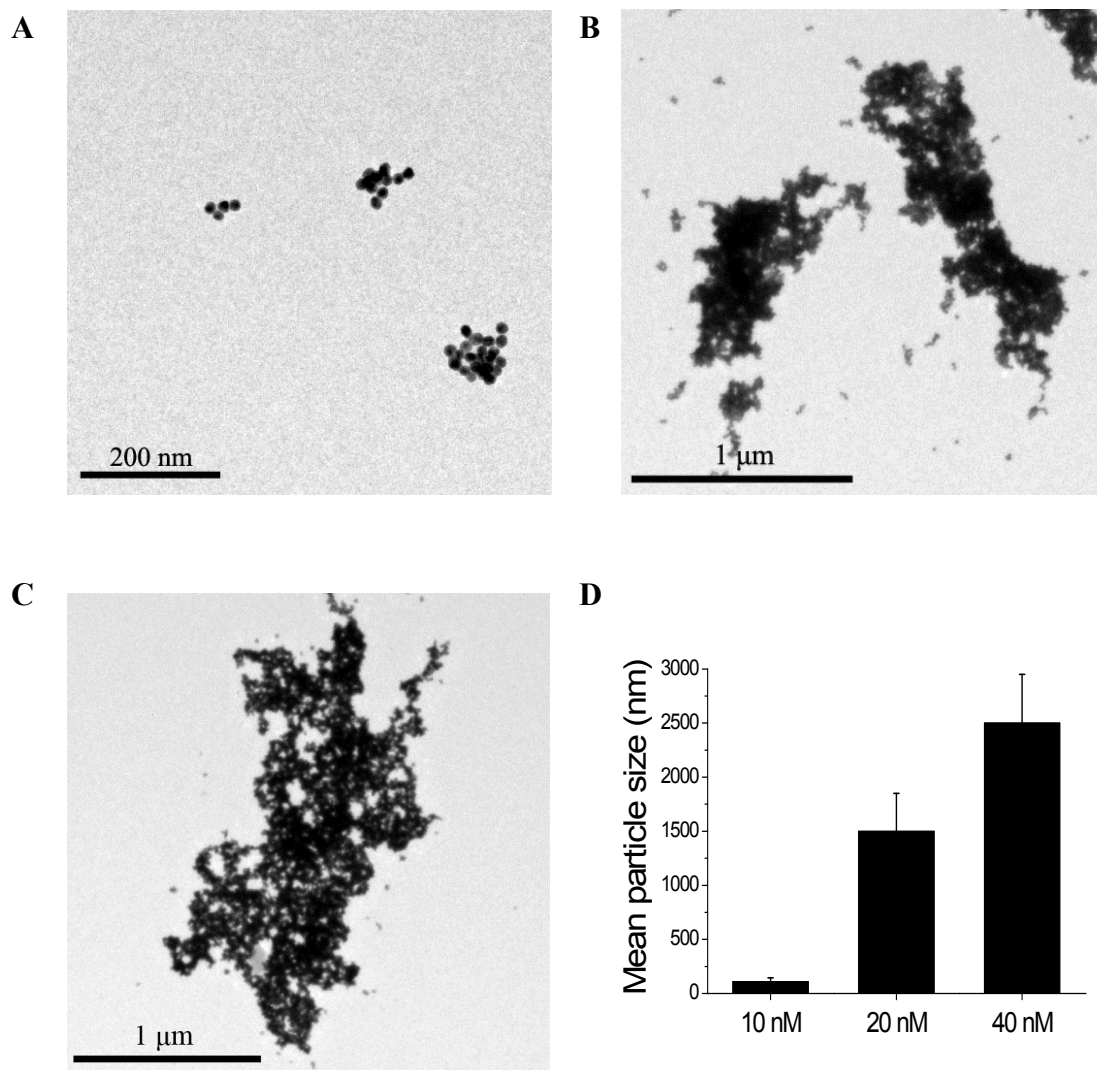

**Fig. S2.** TEM images of AuNPs in physiological buffer solution containing salt (~2.5mM PBS). The concentration of AuNPs is 10nM (A), 20nM (B), and 40nM (C). (D) 10 aggregates/sample were analysed and each data point represents the mean value ( $\pm$ SE).

**Table S1.** The average content of metal elements in plant tissues.

|       |         | Control | 10nM | 20nM | 40nM |
|-------|---------|---------|------|------|------|
| Stem  | K mg/g  | 8.1     | 7.9  | 8.3  | 8.0  |
|       | Ca µg/g | 41.9    | 41.2 | 40.8 | 41.0 |
|       | Fe µg/g | 21.8    | 21.4 | 21.6 | 22.0 |
|       | Zn µg/g | 30.4    | 31.9 | 30.6 | 31.6 |
| Leave | K mg/g  | 2.0     | 2.2  | 2.1  | 2.0  |
|       | Ca µg/g | 29.7    | 29.7 | 30.1 | 29.4 |
|       | Fe µg/g | 62.5    | 63.6 | 62.4 | 61.9 |
|       | Zn µg/g | 34.6    | 35.0 | 33.2 | 33.3 |
